# Supplementary material for: Inducible nitric oxide synthase-derived extracellular nitric oxide flux regulates proinflammatory responses at the single cell level
Source: PubMed Central journal article supplement — Redox Biol. 2019 Nov 1;28:101354. doi: 10.1016/j.redox.2019.101354 (PMC6920088; doi:10.1016/j.redox.2019.101354), 2019-11-01
Supplement: mmc1.pdf [file mmc1.pdf]

**Table S1**

Calculation of conditional probability of TMRE Hi cells being Nos2 Hi, using varying thresholds in Bayes' theorem

| Treatment                                                                           | Nos2 Hi/TMRE Hi cell number               | Nos2 Lo/TMRE Lo cell number                | Nos2 Lo/TMRE Hi cell number          | Nos2 hi/TMRE lo cell number          | Total cells |
|-------------------------------------------------------------------------------------|-------------------------------------------|--------------------------------------------|--------------------------------------|--------------------------------------|-------------|
| Untreated                                                                           | 2                                         | 20                                         | 139                                  | 42                                   | 203         |
| IFNy + LPS                                                                          | 22                                        | 316                                        | 93                                   | 47                                   | 478         |
| <i>Actual Probability (cells counted)</i>                                           |                                           |                                            |                                      |                                      |             |
|                                                                                     | <b>P(Nos2 Hi/TMRE Hi)</b>                 | <b>P(Nos2 Lo/TMRE Lo)</b>                  | <b>P(Nos2 Lo/TMRE Hi)</b>            | <b>P(Nos2 Hi/TMRE Lo)</b>            |             |
|                                                                                     | (Nos2 Hi/TMRE Hi cells) /total cells      | (Nos2 Lo/TMRE Lo cells) /total cells       | (Nos2 Lo/TMRE Hi cells) /total cells | (Nos2 hi/TMRE Lo cells) /total cells |             |
| Untreated                                                                           | 0.009852217                               | 0.098522167                                | 0.684729064                          | 0.206896552                          |             |
| IFNy + LPS                                                                          | 0.046025105                               | 0.661087866                                | 0.194560669                          | 0.09832636                           |             |
| <i>Independent Probability (calculated)</i>                                         |                                           |                                            |                                      |                                      |             |
|                                                                                     | <b>P(Nos2 Hi)</b>                         | <b>P(TMRE Hi)</b>                          | <b>P(Nos2Hi)*P(TMRE Hi)</b>          |                                      |             |
|                                                                                     | (Nos2Hi/TMREHi+Nos2Hi/TMRELo)/total cells | (TMREHi/Nos2Hi+TMREHi/Nos2lo) /total cells |                                      |                                      |             |
| Untreated                                                                           | 0.216748768                               | 0.694581281                                | 0.150549637                          |                                      |             |
| IFNy + LPS                                                                          | 0.144351464                               | 0.240585774                                | 0.034728909                          |                                      |             |
| <i>Conditional probability (calculated from actual and independent probability)</i> |                                           |                                            |                                      |                                      |             |
|                                                                                     | <b>P(TMRE-Hi   Nos2-Hi)</b>               | <b>P(Nos2-Hi   TMRE-Hi)</b>                |                                      |                                      |             |
|                                                                                     | $\frac{P(Nos2 Hi\_TMREHi)}{P(Nos2Hi)}$    | $\frac{P(Nos2 Hi\_TMREHi)}{P(TMREHi)}$     |                                      |                                      |             |
| Untreated                                                                           | 0.045454545                               | 0.014184397                                |                                      |                                      |             |
| IFNy + LPS                                                                          | 0.31884058                                | 0.191304348                                |                                      |                                      |             |
